# Supplementary material
Source: HighWire-hosted journal article supplement (https://www.cmajopen.ca/highwire/filestream/89245/field_highwire_adjunct_files/1/open-2021-0236-original-submission.pdf)
Supplement: open-2021-0236-original-submission.pdf [file open-2021-0236-original-submission.pdf]

1  
2  
3  
4 1 **Adjusting for differential testing: Estimating the incidence of *Chlamydia***  
5 2 ***trachomatis* infections identified through Public Health Ontario laboratories**  
6 3 **in Peel region, Ontario, 2010–2018**  
7  
8  
9 4

11 5 Lindsay Obress MSc<sup>1</sup>, Olaf Berke PhD<sup>1</sup>, David N. Fisman MD MPH<sup>2</sup>, Shilpa Raju MPH<sup>3</sup>,  
12 6 Ashleigh R. Tuite PhD MPH<sup>2</sup>, Monali Varia MHSc<sup>3</sup>, Amy L. Greer PhD<sup>1,2</sup>

14 7 <sup>1</sup> Department of Population Medicine, University of Guelph, Guelph, Canada

16 8 <sup>2</sup> Dalla Lana School of Public Health, University of Toronto, Toronto, Canada

18 9 <sup>3</sup> Peel Public Health, Peel region, Canada  
20  
21 10

22  
23 11 **Corresponding Author:** Amy L. Greer, PhD. Department of Population Medicine, University  
24 12 of Guelph. 50 Stone Rd E, Guelph, ON N1G 2W1. Email: [agreer@uoguelph.ca](mailto:agreer@uoguelph.ca)  
25  
26  
27 13

28  
29 14 **Funding:** This research was funded by the Canada Research Chairs program (ALG). LO was the  
30 15 recipient of an Ontario Graduate Scholarship and an Ontario Veterinary College Scholarship  
31 16 from the University of Guelph.  
32  
33  
34  
35  
36  
37  
38  
39  
40  
41  
42  
43  
44  
45  
46  
47  
48  
49  
50  
51  
52  
53  
54  
55  
56  
57  
58  
59  
60

## 17 Abstract

18 **Background:** Public health guidelines in Canada recommend annual chlamydia testing in sexually  
19 active individuals under 25 years of age and/or those with additional risk factors, such as pregnancy  
20 or history of sexually transmitted infections. However, the frequency of testing is variable across  
21 practitioners and clinic settings. Testing in females is emphasized as they carry the largest reported  
22 burden of chlamydia and the largest risk of chlamydia associated sequelae. While lower rates of  
23 chlamydia infections have been observed in males, it has been hypothesized that males are hidden  
24 reservoirs for *Chlamydia trachomatis* and differential testing may explain the difference in rates  
25 observed across the sexes.

26 **Methods:** This study was based on diagnostic test results recorded by Public Health Ontario  
27 laboratories for individuals living in Peel region, Ontario. The goal of the study was to compare  
28 and interpret results from age and sex standardized testing rates.

29 **Results:** Observed incidence and testing was highest in females aged 20–29, while males had the  
30 highest standardized test positivity across all age groups. After adjusting for testing, males in the  
31 15–19 and 30–39 age groups had 60.2% and 9.7% increase in incidence compared to the observed  
32 incidence.

33 **Interpretation:** It was found that infections in males are likely being missed due to differential  
34 testing and this may be contributing to the persistent increase in reported cases in Canada. Public  
35 health programming that targets males, especially in high-risk settings and communities, and use  
36 of innovative partner notification methods, could be critical to curbing overall rates of chlamydia.

## 39 **Introduction**

40 Public health guidelines for sexually transmitted infection (STI) testing and screening make  
41 recommendations regarding the groups of individuals to whom to target testing and screening  
42 resources (1). In the case of chlamydia, the Public Health Agency of Canada recommends annual  
43 screening for sexually active people under the age of 25; and a recent report from the Canadian  
44 Task Force on Preventive Care recommends annual screening for sexually active people under the  
45 age of 30 (1,2). Despite these guidelines, many factors determine if, and how often, individuals  
46 get tested. In Canada, 60% of individuals surveyed reported they had never been screened for STIs,  
47 suggesting that even with current guidelines, many patients are not screened routinely for STIs (3).  
48 There is significant emphasis placed on testing females under the age of 25 due to the often  
49 asymptomatic nature of chlamydia infections and the possibility of long-term health complications  
50 including pelvic inflammatory disease (PID), infertility, and ectopic pregnancy (4–6). Screening  
51 males however, has been the subject of significant debate and various organizations in the United  
52 States, including the Centers for Disease Control and Prevention (CDC) and the U.S. Preventive  
53 Services Task Force (USPSTF), claim there is insufficient evidence to support regular screening  
54 of young men (7,8). Despite noting asymptomatic infections are common in both males and  
55 females, the CDC does not advise general screening of males for chlamydia and only states it  
56 should be considered in high-risk populations such as men who have sex with men (7). In Canada,  
57 while guidelines are not sex-specific, screening efforts have primarily been focused on women  
58 under the age of 25 and rates of chlamydia in this group continue to increase (9). This leads to  
59 questions regarding the factors that may be contributing to this observed increase. Are increased  
60 rates simply a function of increased testing and therefore, improved case finding? Or, is there a  
61 group of individuals (e.g. males or another age group) being missed by current screening

1  
2  
3 62 guidelines that are contributing to the transmission dynamics but not being identified and receiving  
4  
5 63 treatment to cure their undiagnosed infection. For example, infections in males going undiagnosed  
6  
7  
8 64 can result in an ongoing chain of transmission, where in heterosexual relationships, female partners  
9  
10 65 are at risk of infection and/or reinfection.

11  
12  
13 66 To better understand the influence of testing rates on case detection rates in populations  
14  
15 67 where not all subgroups are tested at the same intensity, standardization can be used to adjust for  
16  
17  
18 68 testing rates among different subgroups of interest to provide an adjusted incidence estimate based  
19  
20 69 on the assumption that all groups were tested at the same rate as the observed maximally tested  
21  
22 70 group (10). This study will focus on chlamydia testing done by Public Health Ontario Laboratories  
23  
24  
25 71 for individuals residing in Peel, Ontario, a municipality in the Greater Toronto Area (GTA). The  
26  
27 72 objectives of this study were to 1) describe the trends in incidence, tests, and test positivity of  
28  
29 73 chlamydia across subgroups over the study period, 2010–2018, in Peel region, Ontario; 2) to  
30  
31 74 determine subgroups that were at highest risk of infection and had the highest testing and test  
32  
33 75 positivity rates; and 3) to estimate the test-adjusted incidence of chlamydia in subgroups assuming  
34  
35 76 they were tested at the same rate as the maximally tested group.

## 36 37 38 39 77 **Materials and Methods**

### 40 41 42 43 78 *Dataset and study population*

44  
45 79 The dataset included results from all chlamydia tests submitted to the Public Health Ontario  
46  
47  
48 80 (PHO) Laboratory in Ontario, Canada between 2010 and 2018. All individuals were 15 years of  
49  
50 81 age (or older) at the time of testing and had a postal address within the region of Peel, Ontario.  
51  
52 82 Incident case reports were obtained from the integrated Public Health Information System (iPHIS)  
53  
54  
55 83 and the number of tests completed was obtained from the Ontario Laboratories Information System

84 (OLIS). Testing data from OLIS were aggregated into 10-year age bands, except for ages 15–19  
 85 years. To calculate rates, population estimates were obtained from Statistics Canada 2006, 2011,  
 86 and 2016 census profiles (11–13). Linear interpolation and extrapolation were used to estimate  
 87 non-census year population sizes. The 2006 and 2011 census population were used to estimate the  
 88 2010 population, the 2011 and 2016 census populations were used to estimate the 2012–2015  
 89 populations, and the 2017–2018 populations. For the purpose of the study, the dataset was divided  
 90 into age-sex subgroups as follows: 15–19 years, 20–29 years, 30–39 years, age 40 and over, for  
 91 males, females, and the overall population. Due to low testing rates and case counts in individuals  
 92 aged 40+, all age groups above 40 years were aggregated into a single group.

93

#### 94 *Standardized morbidity ratio, testing ratio, and test positivity*

95 Standardized morbidity ratio, testing ratio, and test positivity (SMR, STR, and STP) were  
 96 estimated for monthly and cumulative data to explore infections, testing, and test positivity. Where  
 97 a ratio above 1 indicate infections, testing, or test positivity are higher than expected, and below 1  
 98 indicates they are lower than expected. First, average annual incidence of infection, testing, and  
 99 positivity per test, was calculated for the population as a whole and for each age-sex subgroup.  
 100 The ratios were then estimated by dividing subgroup specific estimates by population estimates.  
 101 Confidence intervals were calculated using standard error estimates as follows (14):

$$102 \quad SE(\ln(\text{SMR, STR or STP})) = \sqrt{\left(\frac{1}{A}\right) - \left(\frac{1}{A+C}\right) + \left(\frac{1}{B}\right) - \left(\frac{1}{B+D}\right)}$$

103 Where  $A$  is the case or test count in a subgroup,  $B$  is the case or test count not in the subgroup,  $C$   
 104 is the subgroup population or test count subtract  $A$ , and  $D$  is the population or test count not in the  
 105 subgroup subtract  $B$ .

1  
2  
3 106 The differences in ratios across subgroups and time were explored by constructing meta-  
4  
5 107 regression models weighted by standard error estimates (as described above):  
6  
7

$$8 \quad 108 \quad \ln(\text{SMR, STR, or STP}) = \alpha + \beta_i X_i + \beta_j X_j + \beta_k X_k$$

9  
10  
11 109 where  $\alpha$  is the model intercept and each  $\beta$  represents a coefficient for the  $i^{\text{th}}$  age group,  $j^{\text{th}}$  sex, and  
12  
13  
14 110  $k^{\text{th}}$  year (15).  
15  
16

17 111

18  
19  
20 112 *Adjusting for testing*

21  
22 113 To account for the differential testing across age and sex subgroups, a test-adjusted  
23  
24 114 incidence using standardization was applied. First, the “test-adjusted” SMR was estimated for each  
25  
26 115 subgroup, age- and sex-specific meta-regression models, with standard errors, described above,  
27  
28 116 were constructed. Within-subgroup standard errors were estimated by the summed square root of  
29  
30 117 variance of both SMR and STR. The model follow the form of:  
31  
32

$$33 \quad 34 \quad 118 \quad \ln(\text{SMR}) = \alpha + \beta_1 \ln(\text{STR})$$

35  
36  
37 119 When STR is equal to 1, where testing in a given subgroup is equivalent to the overall population  
38  
39 120 test rate,  $\ln(\text{STR})$  is zero and therefore, the SMR is equal to the intercept,  $\alpha$ , exponentiated ( $e^\alpha$ ).  
40  
41

42 121 This can be interpreted as the test-frequency-adjusted SMR expected when all age-sex subgroups  
43  
44 122 were tested at the same rate as the population overall. To investigate this further, the expected test-  
45  
46 123 frequency-adjusted incidence of each subgroup (if tested at the same rate as the maximally tested  
47  
48 124 subgroup) was calculated, as follows:  
49  
50

$$51 \quad 52 \quad 125 \quad I_{i\text{Tmax}} = \text{SMR}_i * I_0$$

1  
2  
3 126 Hence, the observed average annual incidence in the maximally tested  $i^{\text{th}}$  age-sex subgroup,  $I_{iT_{\text{max}}}$ ,  
4  
5 127 was divided by the test-adjusted  $\text{SMR}_i$  to find  $I_0$ , the test-adjusted expected incidence in the  
6  
7 128 population overall. For all other subgroups, the test-adjusted incidence when tested at the rate of  
8  
9 129 the maximally tested subgroup, was the test-adjusted  $\text{SMR}_i$  multiplied by  $I_0$ . This calculation was  
10  
11 130 conducted for each age-sex subgroup, where females aged 20–29 were the maximally tested  
12  
13 131 subgroup. To determine if there was a change in incidence after test-frequency-adjustment, test-  
14  
15 132 adjusted incidence was compared to observed incidence. If the observed incidence was within the  
16  
17 133 95% confidence interval of the test-adjusted incidence, we assumed the test adjustment did not  
18  
19 134 change the incidence.  
20  
21  
22  
23  
24  
25  
26  
27

### 28 136 *Data Analysis*

29  
30 137 All analyses were conducted using StataIC 16 (16). Figures were created using the *ggplot2*  
31  
32 138 package in R-4.0.2 and RStudio (17–19). A significance level of 5% was used for all tests and  
33  
34 139 confidence intervals. Programming code is available upon request from corresponding author.  
35  
36  
37  
38  
39

### 40 141 *Ethics Approval*

41  
42  
43 142 This study was approved by the University of Guelph Research Ethics Board (REB# 18-  
44  
45 143 11-001).  
46  
47  
48  
49  
50

## 51 145 **Results**

52  
53 146 The dataset included 10,298 cases and 186,567 tests reported by Public Health Ontario  
54  
55 147 Laboratories in Peel, Ontario between January 1<sup>st</sup>, 2010 and December 31<sup>st</sup>, 2018. Individuals with  
56  
57  
58  
59  
60

1  
2  
3 148 unknown age (0 cases, 16 tests), and with unknown sex (21 cases, 3210 tests) were removed  
4  
5 149 resulting in a final dataset of 10,277 cases and 183,341 tests.  
6  
7

8 150 Incidence, testing rate, and test positivity ranged across age and sex groups over time  
9  
10 151 (Figure 1). Case incidence in the 15–19 age group was highest among females from 2010–2014  
11  
12 but decreased from 481 to 357 cases per 100,000 over the study period. In 2014, the female age  
13 152 group with the highest incidence was 20–29 years old and increased from 331 cases per 100,000  
14  
15 153 in 2014 to 435 cases per 100,000 in 2018. In males, the 20–29 age group had consistently higher  
16  
17 154 incidence compared to all other male age groups, ranging from 291 cases per 100,000 to 408 cases  
18  
19 155 per 100,000. The lowest case incidence was in the 40 and over age group across both sexes. In  
20  
21 156 regards to testing, the 20–29 age group was the most tested per 100,000 population in both sexes,  
22  
23 157 however, the rate of testing was much higher in females at approximately 7,000 tests per 100,000  
24  
25 158 population throughout the study period while in males this ranged from approximately 3,000 tests  
26  
27 159 per 100,000 in 2010 to 4,500 tests per 100,000 population in 2018. Percent test positivity was  
28  
29 160 highest among the 15–19 age group in both sexes throughout the study period, except in 2017  
30  
31 161 among males where the 20–29 year age group had slightly higher test positivity. Percent positivity  
32  
33 162 was generally higher in males, when comparing the same age groups.  
34  
35  
36  
37  
38  
39  
40  
41  
42  
43  
44  
45  
46  
47  
48  
49  
50  
51  
52  
53  
54  
55  
56  
57  
58  
59  
60



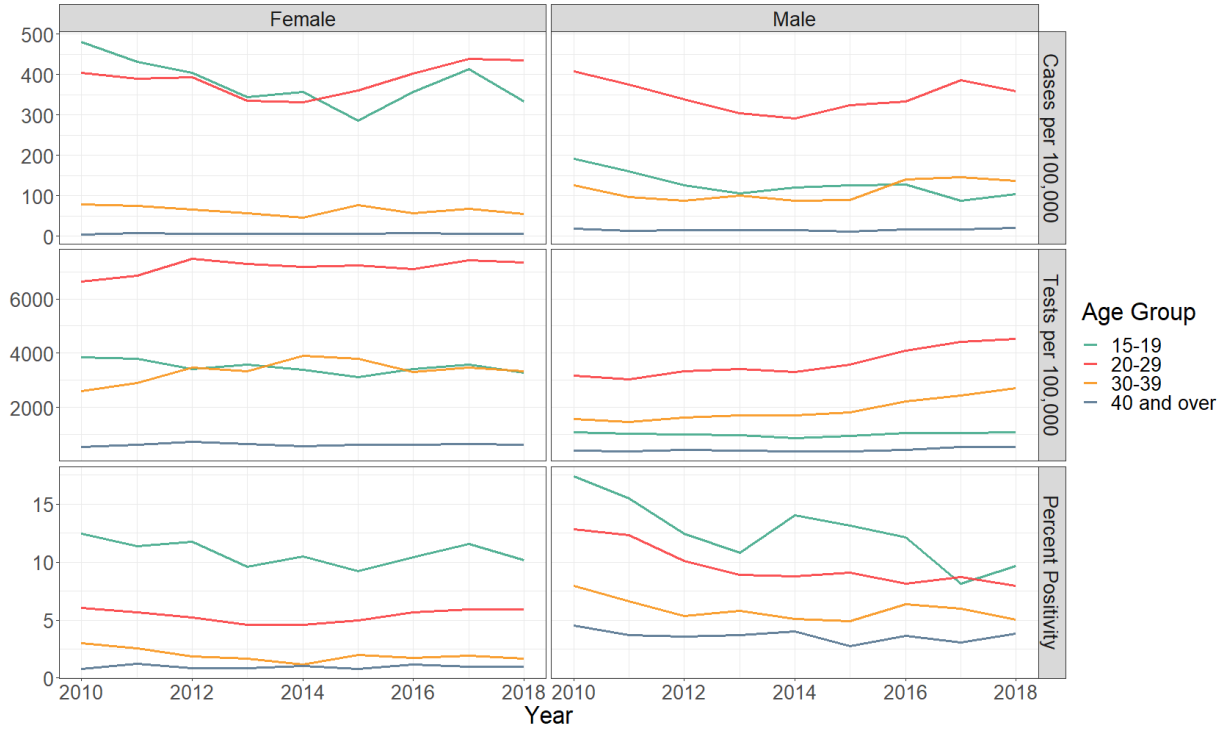

164

165 **Figure 1:** Line graphs of annual chlamydia cases and tests per 100,000 population (top 2 panels  
 166 in each column) and test positivity (bottom panel in each column), grouped by sex and age, in  
 167 Peel, Ontario identified through Public Health Ontario laboratories, 2010–2018.

168

169 The average annual incidence was examined across the age groups by sex (Figure 2). In  
 170 the 15–19 and 20–29-year age groups, females had higher incidence than males, however this  
 171 result is reversed in the 30–39 and 40 and over age groups where males had higher average annual  
 172 incidence. Overall average annual incidence was highest among the 20–29 year age group, with  
 173 the 15–19 age group also having high rates (Figure 2).

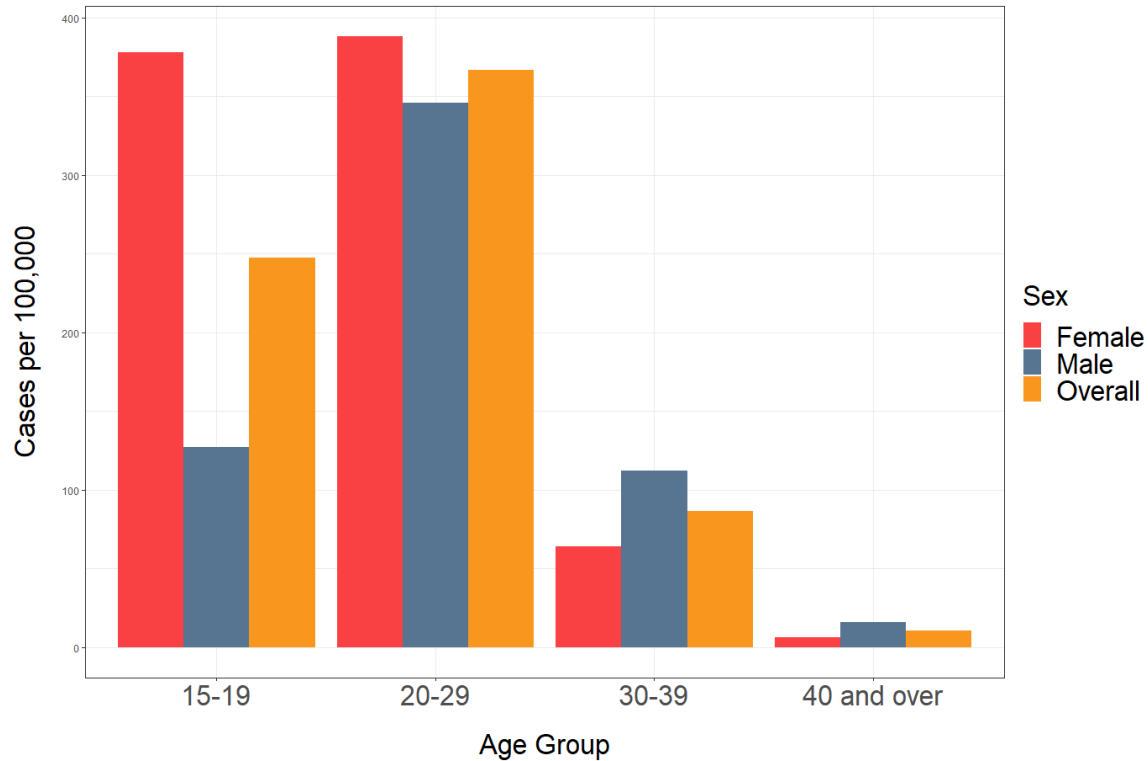

174

175 **Figure 1:** Bar graph of average annual incidence of chlamydia, grouped by age and sex, in Peel,  
 176 Ontario identified through Public Health Ontario laboratories, 2010–2018.

177

178 The standardized morbidity ratio (SMR) was above 1 in females and males aged 15–19  
 179 and 20–29, and in 30–39-year-old males (Figure 3; Table 1). The SMR was below 1 for females  
 180 30 and over, and in males 40 and over (Figure 3; Table 1). The standardized testing ratio (STR)  
 181 was above 1 for females under 40 and males 20–29 and 30–39 (Figure 3; Table 1). The STR was  
 182 below 1 for females and males 40 and over, and in males 15–19 years old (Figure 3; Table 1). The  
 183 standardized test positivity (STP) was above 1 in females and males 15–19 years, and in males  
 184 20–29 and 30–39 (Figure 3; Table 1).

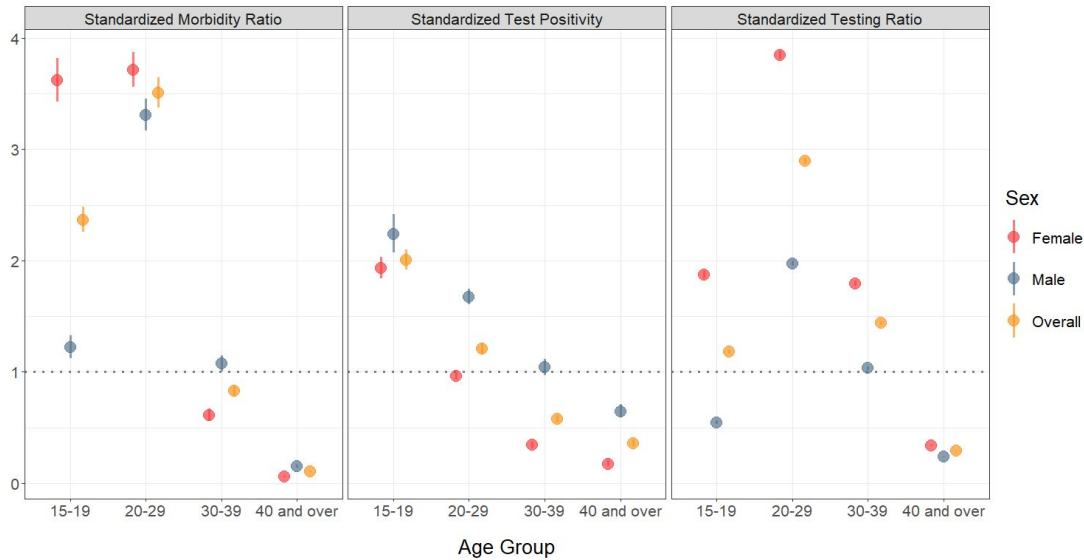

185

186 **Figure 2:** Standardized morbidity ratio (SMR), test positivity (STP), and testing ratio (STR) of  
 187 chlamydia infections in Peel, Ontario identified through Public Health Ontario laboratories,  
 188 2010–2018, by sex and age subgroups. The circle indicates the point estimate of SMR, STP, or  
 189 STR and line indicates 95% confidence interval.

190

191 **Table 1:** Standardized morbidity ratio (SMR), testing ratio (STR), and test positivity (STP) of  
 192 chlamydia infections, by age and sex groups, in Peel, Ontario, identified through Public Health  
 193 Ontario laboratories, 2010–2018.

| Demographic |             | Standardized Ratios |                  |                  |
|-------------|-------------|---------------------|------------------|------------------|
| Sex         | Age Group   | SMR (95% CI)        | STR (95% CI)     | STP (95% CI)     |
| Female      | 15-19       | 3.62 (3.43–3.82)    | 1.87 (1.84–1.90) | 1.93 (1.83–2.04) |
|             | 20-29       | 3.71 (3.56–3.87)    | 3.85 (3.81–3.89) | 0.97 (0.92–1.01) |
|             | 30-39       | 0.61 (0.56–0.67)    | 1.79 (1.77–1.82) | 0.34 (0.32–0.37) |
|             | 40 and over | 0.06 (0.05–0.07)    | 0.34 (0.33–0.34) | 0.17 (0.15–0.20) |
| Male        | 15-19       | 1.22 (1.12–1.32)    | 0.54 (0.53–0.56) | 2.24 (2.05–2.45) |
|             | 20-29       | 3.31 (3.17–3.45)    | 1.97 (1.95–2.00) | 1.68 (1.60–1.75) |
|             | 30-39       | 1.07 (1.01–1.15)    | 1.03 (1.01–1.05) | 1.04 (0.97–1.12) |
|             | 40 and over | 0.15 (0.14–0.17)    | 0.24 (0.23–0.24) | 0.65 (0.59–0.71) |

1  
2  
3 194 Meta-regression models including the predictors age group, sex, and year were applied to  
4  
5 195 estimate investigate the effects on SMR, STR, and STP values. Year was found to have little effect  
6  
7  
8 196 and was removed from the final models (Table 2). Test-adjusted SMR was determined for each  
9  
10 197 age and sex subgroup (Figure 4). Test-adjusted SMR was above 1 in males aged 15–19, 20–29,  
11  
12 198 and 30–39. In females and the overall population, test-adjusted SMR was above 1 in ages 15–19  
13  
14 199 and 20–29. Additionally, the 30–39 age group overall had an SMR above 1 but contained 1 in the  
15  
16 200 confidence interval. All other subgroups, females 30–29, and all sexes 40 and over, had test-  
17  
18 201 adjusted SMR below 1.  
19  
20  
21  
22  
23  
24

25 **Table 2:** Meta-regression models of sex and age on standardized morbidity ratios, standardized  
26 testing ratios, and standardized test positivity, in Peel, Ontario, identified through Public Health  
27 Ontario laboratories, 2010–2018. Females aged 20-29 were used as the referent group in meta-  
28 regression models.  
29

| Covariate          | Standardized Morbidity Ratio |         | Standardized Testing Ratio |         | Standardized Test Positivity |         |
|--------------------|------------------------------|---------|----------------------------|---------|------------------------------|---------|
|                    | SMR (95% CI)                 | P-value | STR (95% CI)               | P-value | STP (95% CI)                 | P-value |
| <b>Sex</b>         |                              |         |                            |         |                              |         |
| <b>Male</b>        | 0.872 (0.826–0.920)          | <0.001  | 0.504 (0.490–0.518)        | <0.001  | 1.837 (1.753–1.901)          | <0.001  |
| <b>Female</b>      | 1 (referent)                 |         | 1 (referent)               |         | 1 (referent)                 |         |
| <b>Age</b>         |                              |         |                            |         |                              |         |
| <b>15-19</b>       | 0.754 (0.706–0.805)          | <0.001  | 0.387 (0.372–0.403)        | <0.001  | 1.842 (1.759–1.953)          | <0.001  |
| <b>20-29</b>       | 1 (referent)                 |         | 1 (referent)               |         | 1 (referent)                 |         |
| <b>30-39</b>       | 0.264 (0.245–0.283)          | <0.001  | 0.490 (0.472–0.509)        | <0.001  | 0.521 (0.498–0.562)          | <0.001  |
| <b>40 and over</b> | 0.041 (0.037–0.045)          | <0.001  | 0.101 (0.098–0.105)        | <0.001  | 0.366 (0.343–0.406)          | <0.001  |

207

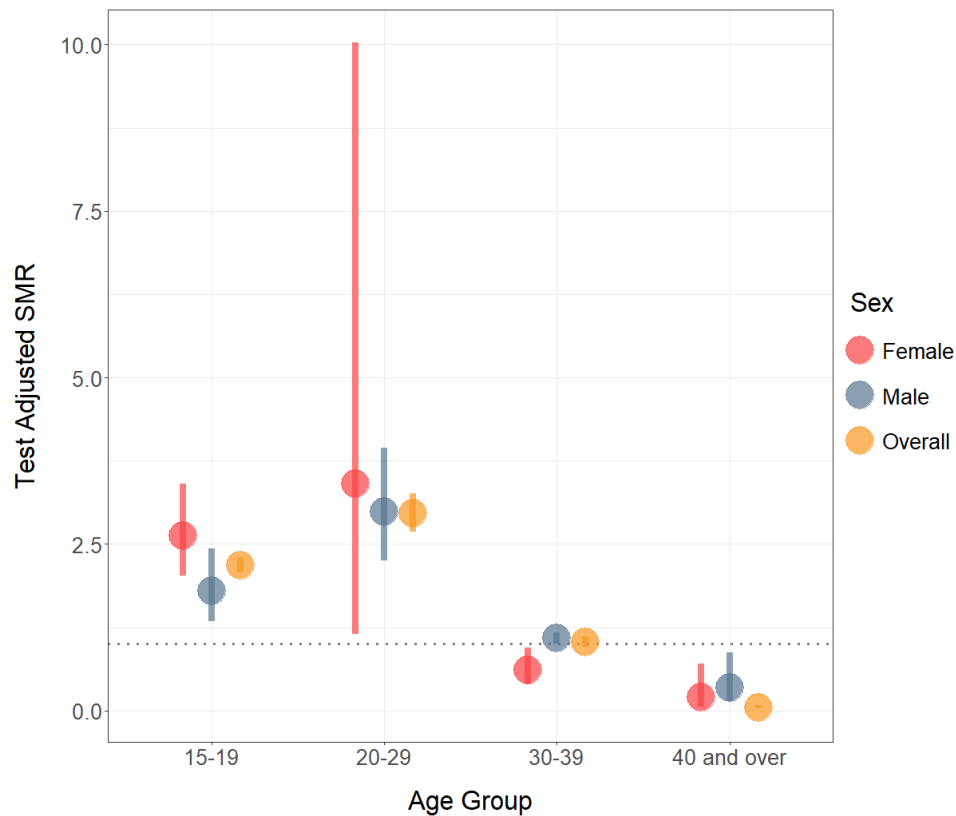

208

209 **Figure 3:** Test-adjusted standardized morbidity ratio (SMR) of chlamydia infections, by age and  
 210 sex subgroups, in Peel, Ontario, identified through Public Health Ontario laboratories, 2010–2018.  
 211 The centre of circle indicates the point estimate of test-adjusted SMR and the line indicates the  
 212 95% confidence interval.

213

214 The most frequently tested age-sex group was women aged 20–29 (STR = 3.85) and  
 215 therefore the average annual incidence of this group was used to derive test-adjusted incidence for  
 216 all other subgroups (Figure 5; Table 3). The estimated test-adjusted incidence in the population  
 217 overall,  $I_0$ , was 114 cases per 100,000 population. This is an 8.5% increase compared to the  
 218 observed average annual incidence of 105 cases per 100,000 population. Test-adjusted incidence  
 219 was higher than observed incidence in males aged 15–19 and 30–39 and in the 30–39 age group  
 220 overall. In males aged 15–19, the test-adjusted incidence was 60.2% higher than the observed

221 incidence (205 vs. 128 cases per 100,000). In males aged 30-39, the test-adjusted incidence was  
 222 9.7% higher than the observed incidence (124 vs. 113 cases per 100,000). The overall incidence  
 223 in the 30–39 age group was 35.6% higher after adjusting for testing than the observed incidence  
 224 (118 vs. 87 cases per 100,000). The overall incidence in the 40 and over age group showed a  
 225 decrease from 11 cases per 100,000 to 6 cases per 100,000 after adjusting for testing. The test-  
 226 adjusted incidence in 15-19-year-old females, 20–29-year-old males and 20–29-year-old age  
 227 groups overall showed decreases, however, the observed incidence was within the 95% confidence  
 228 interval of the test-adjusted incidence and deemed to be not different.

230 **Table 3:** Observed and test-adjusted incidence of chlamydia infections, by age and sex  
 231 subgroups, in Peel, Ontario, identified through Public Health Ontario laboratories, 2010–2018.

| Age Group   | Female |                    | Male |                    | Overall |                   |
|-------------|--------|--------------------|------|--------------------|---------|-------------------|
|             | Obs.   | Test-adj. (95% CI) | Obs. | Test-adj. (95% CI) | Obs.    | Test-adj (95% CI) |
| 15–19       | 379    | 299 (231–388)      | 128  | 205 (152–277)      | 248     | 249 (236–263)     |
| 20–29       | 388    | 388 (132–1143)     | 346  | 340 (257–449)      | 367     | 338 (306–372)     |
| 30–39       | 65     | 69 (45–108)        | 113  | 124 (115–134)      | 87      | 118 (109–127)     |
| 40 and over | 7      | 23 (6–81)          | 16   | 40 (16–99)         | 11      | 5 (3–9)           |

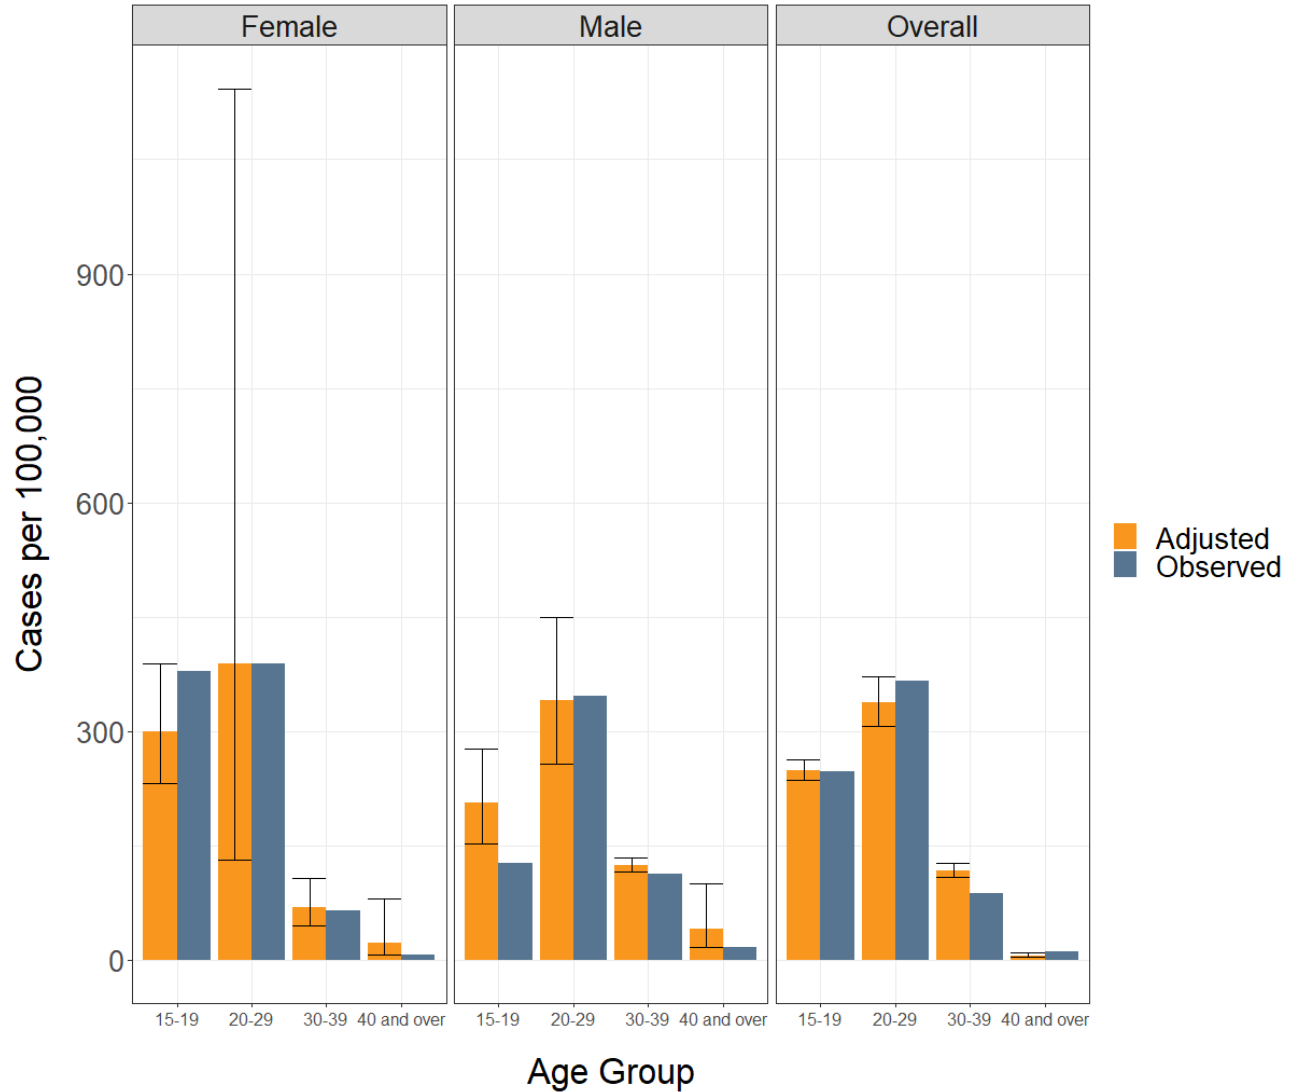

233

234 **Figure 4:** Bar graph of observed and test-adjusted incidence of chlamydia infections, by age and  
 235 sex subgroups, in Peel, Ontario, identified through Public Health Ontario laboratories, 2010–2018.  
 236 Error bars indicate 95% confidence interval of test-adjusted incidence estimates.

237

## 238 Interpretation

239 The findings of this study emphasize the need to further investigate the role of males in the  
 240 dynamics of chlamydia infections in Ontario. Males were most likely to test positive for chlamydia  
 241 but had the lowest testing rate, demonstrated by the highest STP but the lowest STR across all age  
 242 groups (Figure 3). After adjusting for testing frequency, males in the 15–19 and 30–39 age groups

1  
2  
3 243 showed a 60.2% and 9.7% increase in average annual incidence of chlamydia when compared to  
4  
5 244 the observed rates (Figure 5; Table 3). The 30–39 age group showed a 35.6% increase in average  
6  
7 245 annual incidence after adjusting for testing compared to observed rates when both sexes were  
8  
9 246 examined together (Figure 5; Table 3). These increases, after adjusting for testing frequency,  
10  
11 247 suggest that these groups may be under-tested and that they may play a larger role in the  
12  
13 248 transmission dynamics of chlamydia infections than previously considered.  
14  
15  
16  
17

18 249 In this study, year did not have an effect in meta-regression model despite changes to public  
19  
20 250 health policy over time. This could be partially due to the study data source. This study used public  
21  
22 251 health laboratory testing data only, which focuses primarily on tests performed at public health  
23  
24 252 clinics. In Ontario, a large proportion of STI testing is completed at private laboratories and these  
25  
26 253 data were not accessible for the study. Individuals tested through private laboratories may  
27  
28 254 represent a population with different risk factors and may be screened differently due to variability  
29  
30 255 in STI screening practices across primary care physicians and nurses (20–22). In specialized public  
31  
32 256 health clinics, individuals are often seeking STI testing as the reason for their visit and may also  
33  
34 257 have longer consults with care providers (23,24). This may allow for increased opportunistic  
35  
36 258 screening, or a lower threshold for testing in public health clinics compared to primary care due to  
37  
38 259 the dynamics across these settings.  
39  
40  
41  
42

43 260 The hypothesis that males would have higher observed incidence rates if tested more often  
44  
45 261 is supported by literature that finds males less likely to seek health care and be screened for STIs  
46  
47 262 during healthcare visits (25–28). Males are less likely to be tested than females for chlamydia  
48  
49 263 during routine medical exams despite current testing guidelines indicating anyone under age 25 is  
50  
51 264 at risk (3,22,29). Sex is also related to consultation length where females have longer consultations  
52  
53 265 with their primary care physician than males, providing more time to enquire about sexual health  
54  
55  
56  
57



1  
2  
3 266 related risks and to discuss STI screening (27). Teenaged males, ages 13–18, are also less likely to  
4  
5 267 attend sexual health clinics compared to teenaged females (24,28,30). This difference can in part  
6  
7 268 be attributed to teenaged females seeking access to contraceptives, however, once an individual  
8  
9 269 attends a sexual health clinic they are likely to return for future sexual health services providing  
10  
11 270 more opportunities for STI screening and consultations (24,28,30).  
12  
13  
14

15 271 In this study, it was found that there would be more cases identified in males if testing was  
16  
17 272 increased in this group. Modelling has shown that screening males may be cost-effective and help  
18  
19 273 prevent new cases of chlamydia and pelvic inflammatory disease in females (31–33). Modelling  
20  
21 274 by Qu *et al.* showed that for each male screened, 0.062 cases in males and 0.204 cases in females  
22  
23 275 were prevented (32). Modelling also suggests that screening males should target high-risk  
24  
25 276 individuals specifically (31,32). This could include settings where chlamydia rates are known to  
26  
27 277 be high (such as in secondary and post-secondary schools), males who attend sexual health clinics,  
28  
29 278 or within geographic areas with known clusters of cases (31).  
30  
31  
32  
33

34 279 Age is also associated with health care-seeking behaviour where younger people, those  
35  
36 280 who would be most at risk for STIs, are less likely to seek healthcare (25). This could explain the  
37  
38 281 persistence of chlamydia in the younger (under 30) population. It also indicates that more  
39  
40 282 innovative solutions may be needed to curb infections if high-risk individuals are not seeking out  
41  
42 283 testing and treatment. Increased communication around the nature of infections, risk of long-term  
43  
44 284 sequelae, and recommended testing intervals could help younger individuals make more informed  
45  
46 285 choices regarding STI testing. Innovative methods of outreach such as at-home test kits via an  
47  
48 286 Internet and postal mail service, and expedited partner therapy, could help reach these groups (34–  
49  
50 287 38). Studies have found that individuals who use internet-based STI testing have a higher rate of  
51  
52  
53  
54  
55  
56  
57  
58  
59  
60

1  
2  
3 288 repeat testing compared to individuals using clinic-based services (36). This could help increase  
4  
5 289 testing rates in those less likely to seek out healthcare, including young males.  
6  
7

8 290  
9

10  
11 291 *Limitations*  
12  
13

14 292 There are several limitations to consider when making conclusions from this study. The  
15  
16 293 largest limitation is that only testing data from provincial public health laboratories were included.  
17  
18 294 When STI screening is completed through primary care physicians, testing is usually completed at  
19  
20 295 a private laboratory such as LifeLabs or Dynacare, in Ontario, Canada (39). Tests performed  
21  
22 296 through public health laboratories may be biased towards individuals screened at public health  
23  
24 297 clinics, where individuals are often seeking STI testing. Additionally, focusing on Peel, Ontario as  
25  
26 298 a subset of the Ontario population may not be representative of chlamydia dynamics in other health  
27  
28 299 units. For these reasons, generalizability outside of the community that uses public health clinics  
29  
30 300 should be cautioned.  
31  
32  
33  
34  
35

36 301

37  
38 302 *Conclusion*  
39  
40

41 303 In conclusion, the role of males in transmission dynamics of chlamydia requires further  
42  
43 304 investigation. This study found that males are under-tested and if tested at the same rate as 20–29-  
44  
45 305 year-old females, the observed maximally tested group for chlamydia, teenaged males (ages 15-  
46  
47 306 19) and males 30–39 years would likely have higher observed average annual rates of chlamydia  
48  
49 307 than what is identified through current testing. Programs that target hard-to-reach, high-risk males,  
50  
51 308 specifically those under 30 years old could be critical for reducing the overall burden of chlamydia  
52  
53 309 in this health unit.  
54  
55  
56  
57

## 310 1.1 References

- 311 1. Public Health Agency of Canada. Canadian Guidelines on Sexually Transmitted Infections  
 312 [Internet]. Public Health Agency of Canada. 2008. Available from: <http://www.phac->  
 313 [aspc.gc.ca/std-mts/sti-its/cgsti-ldcits/index-eng.php#toc](http://www.phac-aspc.gc.ca/std-mts/sti-its/cgsti-ldcits/index-eng.php#toc)
- 314 2. Moore A, Traversy G, Reynolds DL, Riva JJ, Thériault G, Wilson BJ, et al.  
 315 Recommendation on screening for chlamydia and gonorrhoea in primary care for individuals  
 316 not known to be at high risk. *Can Med Assoc J.* 2021;193(16):E549–59.
- 317 3. Public Health Agency of Canada. Summary of recommendations for Chlamydia  
 318 trachomatis (CT), Neisseria gonorrhoeae (NG) and Syphilis [Internet]. Diseases and  
 319 Conditions. 2019. Available from: <https://www.canada.ca/content/dam/phac->  
 320 [aspc/documents/services/publications/diseases-conditions/sti/64-02-18-2248-STI-](https://www.canada.ca/content/dam/phac-aspc/documents/services/publications/diseases-conditions/sti/64-02-18-2248-STI-)  
 321 [Recommendations-Tip-Sheet-EN-Final.pdf](https://www.canada.ca/content/dam/phac-aspc/documents/services/publications/diseases-conditions/sti/64-02-18-2248-STI-Recommendations-Tip-Sheet-EN-Final.pdf)
- 322 4. Mishori R, McClaskey EL, Winklerprins VJ. Chlamydia trachomatis infections: Screening,  
 323 diagnosis, and managment. *Am Fam Physician* [Internet]. 2012;86(12):1127–32. Available  
 324 from: <http://dx.doi.org/>
- 325 5. Hoenderboom BM, Van Benthem BHB, Van Bergen JEAM, Dukers-Muijrs NHTM, Götz  
 326 HM, Hoebe CJP, et al. Relation between Chlamydia trachomatis infection and pelvic  
 327 inflammatory disease, ectopic pregnancy and tubal factor infertility in a Dutch cohort of  
 328 women previously tested for chlamydia in a chlamydia screening trial. *Sex Transm Infect.*  
 329 2019;95(4):300–6.
- 330 6. Public Health Agency of Canada. Canadian Guidelines on Sexually Transmitted Infections  
 331 [Internet]. Canadian Guidelines on Sexually Transmitted Infections. Ottawa, ON; 2008.  
 332 Available from: [https://www.canada.ca/](https://www.canada.ca/en/public-health/services/infectious-)  
 333 [en/public-health/services/infectious-](https://www.canada.ca/en/public-health/services/infectious-diseases/sexual-health/sexually-transmitted-infections/canadian-guidelines/sexually-transmitted-infections/canadian-guidelines-sexually-transmitted-infections-30.html)  
 334 [diseases/sexual-health](https://www.canada.ca/en/public-health/services/infectious-diseases/sexual-health/sexually-transmitted-infections/canadian-guidelines/sexually-transmitted-infections/canadian-guidelines-sexually-transmitted-infections-30.html)  
[h-sexually-transmitted-infections/canadian-guidelines/](https://www.canada.ca/en/public-health/services/infectious-diseases/sexual-health/sexually-transmitted-infections/canadian-guidelines/sexually-transmitted-infections/canadian-guidelines-sexually-transmitted-infections-30.html)  
[sexually-](https://www.canada.ca/en/public-health/services/infectious-diseases/sexual-health/sexually-transmitted-infections/canadian-guidelines/sexually-transmitted-infections/canadian-guidelines-sexually-transmitted-infections-30.html)  
[transmitted-infections/canadian-guideline](https://www.canada.ca/en/public-health/services/infectious-diseases/sexual-health/sexually-transmitted-infections/canadian-guidelines/sexually-transmitted-infections/canadian-guidelines-sexually-transmitted-infections-30.html)  
[s-sexually-transmitted-infections-30.html](https://www.canada.ca/en/public-health/services/infectious-diseases/sexual-health/sexually-transmitted-infections/canadian-guidelines/sexually-transmitted-infections/canadian-guidelines-sexually-transmitted-infections-30.html)
- 335 7. Centers for Disease Control and Prevention. 2015 STD Treatment Guidelines [Internet].  
 336 2015 [cited 2021 Apr 23]. Available from: <https://www.cdc.gov/std/tg2015/chlamydia.htm>
- 337 8. Cantor A, Dana T, Griffin JC, Nelson HD, Weeks C, Winthrop KL, et al. Screening for  
 338 Chlamydial and Gonococcal Infections: A Systematic Review Update for the U . S .  
 339 Preventive Services Task Force [Internet]. Portland, OR; 2021. Available from:  
 340 [https://www.uspreventiveservicestaskforce.org/uspstf/recommendation/chlamydia-and-](https://www.uspreventiveservicestaskforce.org/uspstf/recommendation/chlamydia-and-gonorrhea-screening)  
 341 [gonorrhea-screening](https://www.uspreventiveservicestaskforce.org/uspstf/recommendation/chlamydia-and-gonorrhea-screening)
- 342 9. Public Health Agency of Canada. Report on Sexually Transmitted Infections in Canada:  
 343 2017 [Internet]. Ottawa, ON; 2019. Available from: <http://www.phac-aspc.gc.ca/std->  
 344 [mts/report/sti-its2008/05-eng.php](http://www.phac-aspc.gc.ca/std-mts/report/sti-its2008/05-eng.php)
- 345 10. Fisman DN, Greer AL, Brankston G, Hillmer M, O'Brien SF, Drews SJ, Tuite AR. COVID-  
 346 19 Case Age Distribution: Correction for Differential Testing by Age. *Ann Intern Med.*  
 347 2021; doi:10.7326/M20-7003

- 1  
2  
3 348 11. Statistics Canada. 2006 Census of Population [Internet]. Ottawa, ON: Statistics Canada;  
4 349 2007. Available from: [https://www12.statcan.gc.ca/census-recensement/2006/dp-  
6 pd/prof/92-591/index.cfm?Lang=E%0A](https://www12.statcan.gc.ca/census-recensement/2006/dp-<br/>5 350 pd/prof/92-591/index.cfm?Lang=E%0A)
- 7  
8 351 12. Statistics Canada. 2011 Census of Population [Internet]. Ottawa, ON: Statistics Canada;  
9 352 2012. Available from: [http://www12.statcan.gc.ca/census-recensement/2011/dp-  
11 pd/prof/index.cfm?Lang=E](http://www12.statcan.gc.ca/census-recensement/2011/dp-<br/>10 353 pd/prof/index.cfm?Lang=E)
- 12 354 13. Statistics Canada. 2016 Census of Population [Internet]. Ottawa, ON: Statistics Canada;  
13 355 2017. Available from: [http://www12.statcan.gc.ca/census-recensement/2016/dp-  
15 pd/prof/index.cfm?Lang=E](http://www12.statcan.gc.ca/census-recensement/2016/dp-<br/>14 356 pd/prof/index.cfm?Lang=E)
- 16 357 14. Altman DG, Gardner MJ. Statistics in Medicine: Calculating confidence intervals for  
17 358 regression and correlation. *Br Med J*. 1988;296(6631): 1313–6.
- 19  
20 359 15. Sharp S. Meta-analysis regression [Internet]. *Stata Technical Bulletin*. 1998. p. 16–22.  
21 360 Available from: <https://www.stata-press.com/journals/stbcontents/stb42.pdf>
- 22  
23 361 16. StataCorp. *Stata Statistical Software: Release 16*. College Station, TX: StataCorp LLC;  
24 362 2019.
- 26 363 17. R Core Team. *R: A language and environment for statistical computing*. [Internet]. Vienna,  
27 364 Austria; 2020. Available from: <https://www.r-project.org/%0A>
- 29  
30 365 18. RStudio Team. *RStudio: Integrated Development Environment for R*. [Internet]. Boston,  
31 366 MA; 2020. Available from: <http://www.rstudio.com/>
- 32  
33 367 19. Wickham H. *ggplot2: Elegant Graphics for Data Analysis*. New York: Springer-Verlag;  
34 368 2016.
- 36 369 20. Guerry SL, Bauer HM, Packel L, Samuel M, Chow J, Rhew M, et al. Chlamydia screening  
37 370 and management practices of primary care physicians and nurse practitioners in California.  
38 371 *J Gen Intern Med*. 2005;20(12):1102–7.
- 40  
41 372 21. Pujalte GGA, Effiong II, Nishi LYM, Clapp ADM, Waller TA. Primary Care Perceptions  
42 373 and Practices on Discussion and Advice Regarding Sexual Practices. *South Med J*.  
43 374 2020;113(7):356–9.
- 45 375 22. Machalek K, Hanley BE, Kajiwarra JN, Pasquali PE, Stannard CJ. Chlamydia screening  
46 376 practices among physicians and community nurses in Yukon, Canada. *Int J Circumpolar*  
47 377 *Health*. 2013;72(SUPPL.1):1–11.
- 49  
50 378 23. Masaro CL, Johnson J, Chabot C, Shoveller J. STI service delivery in British Columbia,  
51 379 Canada; Providers' views of their services to youth. *BMC Health Serv Res*. 2012;12(1).
- 52  
53 380 24. Region of Waterloo Public Health. *Region of Waterloo Public Health Sexual Health and*  
54 381 *Harm Reduction Program Report 2014-2015*. Waterloo, ON; 2016.

- 1  
2  
3 382 25. Thompson AE, Anisimowicz Y, Miedema B, Hogg W, Wodchis WP, Aubrey-Bassler K.  
4 383 The influence of gender and other patient characteristics on health care-seeking behaviour:  
5 384 A QUALICOPC study. *BMC Fam Pract* [Internet]. 2016;17(1):1–7. Available from:  
6 385 <http://dx.doi.org/10.1186/s12875-016-0440-0>
- 7  
8  
9 386 26. Matheson FI, Smith KLW, Fazli GS, Moineddin R, Dunn JR, Glazier RH. Physical health  
10 387 and gender as risk factors for usage of services for mental illness. *J Epidemiol Community*  
11 388 *Health*. 2014;68(10):971–8.
- 12  
13 389 27. Deveugele M, Derese A, Van Den Brink-Muinen A, Bensing J, de Maeseneer J.  
14 390 Consultation length in general practice: Cross sectional study in six European countries.  
15 391 *Bmj*. 2002;325(7362):472.
- 16  
17 392 28. Kingston Frontenac Lennox and Addington Public Health. Teen Sexual Health Clinic  
18 393 Evaluation [Internet]. Kingston, ON; 2013. Available from:  
19 394 [https://www.kflaph.ca/en/research-and-reports/Teen-Sexual-Health-Clinic-](https://www.kflaph.ca/en/research-and-reports/Teen-Sexual-Health-Clinic-Introduction.aspx?_mid_=110063)  
20 395 [Introduction.aspx?\\_mid\\_=110063](https://www.kflaph.ca/en/research-and-reports/Teen-Sexual-Health-Clinic-Introduction.aspx?_mid_=110063)
- 21  
22  
23 396 29. Tao G, Irwin KL. Receipt of HIV and STD testing services during routine general medical  
24 397 or gynecological examinations: Variations by patient sexual risk behaviors. *Sex Transm*  
25 398 *Dis*. 2008;35(2):167–71.
- 26  
27 399 30. Flicker S, Flynn S, Larkin J, Travers R, Guta A, Pole J, et al. The Toronto Teen Survey  
28 400 report [Internet]. Toronto, ON; 2009. Available from:  
29 401 [https://utgaap.files.wordpress.com/2019/10/tts\\_report.pdf](https://utgaap.files.wordpress.com/2019/10/tts_report.pdf)
- 30  
31  
32 402 31. Gift TL, Gaydos CA, Kent CK, Marrazzo JM, Rietmeijer CA, Schillinger JA, et al. The  
33 403 Program Cost and Cost-Effectiveness of Screening Men for Chlamydia to Prevent Pelvic  
34 404 Inflammatory Disease in Women. *Sex Transm Dis*. 2008;35(11):S66–75.
- 35  
36 405 32. Qu Z, Azizi A, Schmidt N, Craig-Kuhn MC, Stoecker C, Hyman J Mac, et al. Effect of  
37 406 screening young men for Chlamydia trachomatis on the rates among women: A network  
38 407 modelling study for high-prevalence communities. *BMJ Open*. 2021;11(1):1–10.
- 39  
40  
41 408 33. Gopalappa C, Huang Y-LA, Gift TL, Owusu-Edusei K, Taylor M, Gales V. Cost-  
42 409 Effectiveness of screening men in Maricopa County jails for chlamydia and gonorrhea to  
43 410 avert infections in women. *Sex Transm Dis*. 2013;40(10):776–83.
- 44  
45 411
- 46  
47 412 34. Gilbert M, Haag D, Hottes TS, Bondyra M, Elliot E, Chabot C, et al. Get Checked... Where?  
48 413 The Development of a Comprehensive, Integrated Internet-Based Testing Program for  
49 414 Sexually Transmitted and Blood-Borne Infections in British Columbia, Canada. *JMIR Res*  
50 415 *Protoc*. 2016;5(3):e186.
- 51  
52  
53 416 35. Wilson E, Free C, Morris TP, Syred J, Ahamed I, Menon-Johansson AS, et al. Internet-  
54 417 accessed sexually transmitted infection (e-STI) testing and results service: A randomised,  
55 418 single-blind, controlled trial. *PLoS Med*. 2017;14(12):1–20.

- 1  
2  
3 419 36. Gilbert M, Salway T, Haag D, Elliot E, Fairley C, Kraiden M, et al. A cohort study  
4 420 comparing rate of repeat testing for sexually transmitted and blood-borne infections  
5 421 between clients of an internet-based testing programme and of sexually transmitted  
6 422 infection clinics in Vancouver, Canada. *Sex Transm Infect.* 2019;95(7):540–6.
- 8  
9 423 37. Golden MR, Whittington WLH, Handsfield HH, Hughes JP, Stamm WE, Hogben M, et al.  
10 424 Effect of expedited treatment of sex partners on recurrent or persistent gonorrhea or  
11 425 chlamydial infection. *N Engl J Med.* 2005;352(7):676–85.
- 13 426 38. Centers for Disease Control and Prevention. Expedited partner therapy in the management  
14 427 of sexually transmitted diseases. Atlanta, GA; 2006.
- 16 428 39. MacKinnon KR, Mykhalovskiy E, Worthington C, Gómez-Ramírez O, Gilbert M, Grace D.  
17 429 Pay to skip the line: The political economy of digital testing services for HIV and other  
18 430 sexually transmitted infections. *Soc Sci Med.* 2021;268.

20  
21 431  
22  
23  
24  
25  
26  
27  
28  
29  
30  
31  
32  
33  
34  
35  
36  
37  
38  
39  
40  
41  
42  
43  
44  
45  
46  
47  
48  
49  
50  
51  
52  
53  
54  
55  
56  
57  
58  
59  
60

Confidential

1  
2  
3  
4 **Appendix**  
5  
6  
7

8 **Table A1:** Summary of monthly chlamydia incidence and testing rates and percentage positivity  
9 by age group and sex in Peel, Ontario, identified through Public Health Ontario laboratories,  
10 2010–2018.  
11

| Demographic |             | Monthly Median Value (Range) |               |                 |
|-------------|-------------|------------------------------|---------------|-----------------|
| Sex         | Age Group   | Cases                        | Tests         | Positivity (%)  |
| Female      | 15-19       | 14 (4–26)                    | 134 (96–194)  | 11.1 (3.8–18.5) |
|             | 20-29       | 29 (15–47)                   | 552 (407–668) | 5.3 (2.5–8.9)   |
|             | 30-39       | 5 (1–14)                     | 269 (166–365) | 1.7 (0.3–6.3)   |
|             | 40 and over | 2 (0–6)                      | 174 (90–268)  | 1.0 (0–3.3)     |
| Male        | 15-19       | 5 (0–14)                     | 43 (23–71)    | 12.5 (0–27.0)   |
|             | 20-29       | 27 (14–42)                   | 270 (182–443) | 9.1 (4.4–16.2)  |
|             | 30-39       | 7 (1–17)                     | 132 (82–219)  | 5.6 (0.8–12.6)  |
|             | 40 and over | 4 (0–9)                      | 105 (67–182)  | 3.4 (0–11.8)    |

12  
13  
14  
15  
16  
17  
18  
19  
20  
21  
22  
23  
24  
25  
26  
27  
28  
29  
30  
31  
32  
33  
34  
35  
36  
37  
38  
39  
40  
41  
42  
43  
44  
45  
46  
47  
48  
49  
50  
51  
52  
53  
54  
55  
56  
57  
58  
59  
60
